# Supplementary material
Source: HighWire-hosted journal article supplement (https://hw-f5-jim.highwire.org/content/69/2/358)
Supplement: inline-supplementary-material-1 [file inline-supplementary-material-1.pdf]

ICD9 codes for secondary outcomes**1. Aortic valve replacement**

35.21 Replacement of aortic valve with tissue graft

35.22 Other replacement of aortic valve

**2. Mitral valve replacement**

35.23 Replacement of mitral valve with tissue graft

35.24 Other replacement of mitral valve

**3. Vascular Complications**

868.04 Retroperitoneal hematoma

997.2 Peripheral vascular complications, NOS

997.7 Vascular complications of other vessels

999.2 Vascular complications, NEC

447.0 Arteriovenous fistula, acquired

901.0 Injury to thoracic aorta

902.0 Injury to abdominal aorta

904.0 Injury to common femoral artery

998.11 Hemorrhage complicating a procedure

998.12 Hematoma complicating a procedure

998.2 Accidental laceration during a procedure

**7. Vascular Complications Requiring Surgery**

39.31 Suture of artery

39.41 Control of hemorrhage

39.49 Other revision of vascular procedure

39.52 Repair of aneurysm

39.53 Repair of arteriovenous fistula

39.56 Repair of vessel with tissue patch

39.57 Repair of vessel with synthetic patch

39.58 Repair of vessel with unspecified patch

39.59 Repair of vessel, unspecified

**8. Cardiogenic shock**

785.51

**9. Cardiac arrest**

427.5

**10. Stroke**

434.91 Cerebral artery occlusion, unspecified with cerebral infarction  
430 Subarachnoid hemorrhage  
431 Intracerebral hemorrhage  
432.0 Nontraumatic extradural hemorrhage  
432.1 Subdural hemorrhage  
432.9 Unspecified intracranial hemorrhage  
433.01 Cerebral thrombus with infarction  
433.11 Occlusion of carotid artery, with cerebral infarction  
433.21 Occlusion of vertebral artery with cerebral infarction  
433.31 Occlusion of bilateral precerebral arteries with infarction  
433.81 Occlusion of other precerebral arteries with cerebral infarction  
433.91 Occlusion of unspecified precerebral arteries with infarction  
434.00 Cerebral infarction without mention of cerebral infarction  
434.01 Cerebral infarction with cerebral infarction  
434.10 Cerebral embolism without mention of cerebral infarction  
434.11 Cerebral embolism with cerebral infarction  
436 Acute cerebral vascular disease, ill-defined  
997.02 Iatrogenic cerebral infarction

**11. Acute Kidney Injury**

584.5 Acute Kidney Injury with tubular necrosis  
584.6 Acute Kidney Injury with lesion of renal cortical necrosis  
584.6 Acute Kidney Injury with lesion of renal cortical necrosis  
584.8 Acute Kidney Injury, other specified pathological lesion in kidney  
584.9 Acute Kidney Injury, unspecified

**12. Acute Kidney Injury Requiring Dialysis**

39.95 Hemodialysis (in addition to acute kidney injury)  
585.6 End stage renal disease – excluded

**13. Pacemaker Implantation**

00.50 Implantation of CRT-P, total system  
00.51 Implantation of CRT-D, total system  
00.52 Implantation of coronary sinus lead  
00.53 Implantation of CRT-P generator only  
00.54 Implantation of CRT-D generator only  
37.70 Initial insertion of lead, NOS

- 37.71 Initial insertion of lead, ventricle
- 37.72 Initial insertion of lead, ventricle and atrium
- 37.73 Initial insertion of lead, atrium
- 37.80 Initial insertion of permanent pacemaker, NOS
- 37.81 Initial insertion of single-chamber pacemaker
- 37.82 Initial insertion of single-chamber pacemaker, rate responsive
- 37.83 Initial insertion of dual-chamber pacemaker
- 37.94 Implantation of ICD, total system
- 37.96 Implantation of ICD, generator only

#### **14. Blood Transfusion CCS diagnosis**

- 222 Blood transfusion

#### **15. Cardiac Tamponade**

- 423.3 Cardiac tamponade

#### **16. Acquired Pneumonia**

- 486 Pneumonia, organism unspecified
- 481 Pneumococcal pneumonia
- 482.8 Pneumonia due to other specified bacteria
- 482.3 Pneumonia due to streptococcus

#### **17. Urinary Tract Infection**

- 599.0 Urinary tract infection, site not specified
- 590.9 Infection of kidney, unspecified

#### **18. Sepsis**

- 995.91 Sepsis
- 038 Septicemia.
- 995.92 Severe sepsis
- 996.64 Infection and inflammatory reaction due to indwelling urinary catheter
- 999.31 Other and unspecified infection due to central venous catheter
- 999.32 Bloodstream infection due to central venous catheter

#### **19. Mechanical Ventilation**

- 96.72 Invasive mechanical ventilation

#### **20. Tracheostomy**

- 311 Temporary tracheostomy
- 31.21 Mediastinal tracheostomy
- 31.29 Other permanent tracheostomy

#### **21. Gastrostomy**

- 43.11 Percutaneous [endoscopic] Gastrostomy [PEG]

## 43.19 Other gastrostomy

**22. Hepatic**

570 hepatic necrosis

572.2 Hepatic encephalopathy

573.3 unspecified hepatitis

**23. Hematologic**

287.3, 287.4, 287.5 Thrombocytopenia

286.9 Coagulopathy

**24. Metabolic/lactic acidosis**

276.2
